# Supplementary material
Source: publisher site journal article supplement (https://www.dovepress.com/article/571289)
Supplement: Supplementary file 1 [file 571289%20Revised%20Supplementary%20Tables.docx]

**SUPPLEMENTAL MATERIAL FOR**

**Content Validity and Psychometric Evaluation of the Idiopathic Hypersomnia Severity Scale (IHSS) in Adults With Idiopathic Hypersomnia**

Junji Lin1; Caitlyn Lowe2; Benjamin Banderas2;
Patricia Chandler1; Ethan Arenson2; Alan Shields2;
Susan Morris1, Bhavini Srivastava1; Yves Dauvilliers3,4

1Jazz Pharmaceuticals, Palo Alto, CA, USA; 2Adelphi Values, Boston, MA, USA;
3Sleep and Wake Disorders Centre, Department of Neurology, Gui de Chauliac Hospital, Montpellier, France; 4University of Montpellier, INSERM Institute Neuroscience Montpellier (INM), Montpellier, France.

| Table S1—Psychometric analysis populations. | |
| --- | --- |
| mITT population | All patients who:   - Were randomized to LXB or placebo; - Received ≥1 dose of LXB or placebo during the Double-Blind Randomized Withdrawal Period; and - Had ≥1 set of post-randomization scores for the ESS, IHSS, or PGI-C |
| PsAP | All mITT patients with ≥1 completed response to the IHSS at any of the following timepoints:   - Baseline - Week 1 - Week 8 - End of Open Label Treatment Titration and Optimization Period - End of Stable Dose Period - End of Double-Blind Randomized Withdrawal Period |
| TRT-APa | For these analyses, 2 groups were defined at 3 time intervals each (a-c) for a total of 6 test–retest analysis populations examined:   - Group 1 had the same ESS severity level at both timepoints in each time interval  1. (1a) Baseline to Week 1 [TRT-AP-1a] 2. (1b) Stable Dose Period [TRT-AP-1b] 3. (1c) Double-Blind Randomized Withdrawal Period [TRT-AP-1c]  - Group 2 responded “no change” to PGI-C at second timepoint in each time interval  1. (2a) Baseline to Week 1 [TRT-AP-2a] 2. (2b) Stable Dose Period [TRT-AP-1b] 3. (2c) Double-Blind Randomized Withdrawal Period [TRT-AP-2c] |

aTest–retest analyses require the definition of stable groups of patients.

ESS, Epworth Sleepiness Scale; IHSS, Idiopathic Hypersomnia Severity Scale; LXB, low-sodium oxybate; mITT, modified intent-to-treat; PGI-C, Patient Global Impression of Change; PsAP, psychometric analysis population; TRT-AP, test–retest analysis population.

| Table S2—Supplemental assessments for psychometric evaluation. | | | | |
| --- | --- | --- | --- | --- |
| Measure | Concept(s) Measured | Recall Period | Items, n | Scoring |
| Epworth Sleepiness Scale (ESS) | Daytime sleepiness or average sleep propensity, including chance of dozing during a variety of daily situations (eg, watching TV) | Past week | 8 | 4-point verbal response scale ranging from 0 (would never doze) to 3 (high chance of dozing); total score is calculated from summing the 8 individual item scores; total scores range from 0 to 24, with higher scores indicating more severe daytime sleepiness |
| Clinical Global Impression of Change (CGI-C) | Change in participants’ condition as rated by clinicians | Change in condition compared with baseline visit | 1 | 7-point Likert-type scale ranging from 1 (very much improved) to 7 (very much worse); lower scores indicate improvement in condition; a score of 4 denotes “no change” |
| Functional Outcomes of Sleep Questionnaire (FOSQ-10) | Impact of daytime sleepiness on activities of daily living | Past 7 days | 10 | 5-point verbal response scale ranging from 1 (extreme difficulty) to 4 (no difficulty); total scores range from 5 to 20, with higher scores indicating better functionalitya |
| Patient Global Impression of Change (PGI-C) | Overall change in patients’ idiopathic hypersomnia symptoms | Baseline visit to time of assessment | 1 | 7-point Likert-type scale ranging from 1 (very much improved) to 7 (very much worse); lower scores indicate positive change in condition; a score of 4 denotes “no change” |
| Work Productivity and Activity Impairment Questionnaire: Specific Health Problem, Version 2.0 (WPAI:SHP) | Impact of a specified health problem (ie, idiopathic hypersomnia) on an individual’s ability to work and perform regular activities | Past 7 days | 6 | 11-point numeric rating scale ranging from no effect due to idiopathic hypersomnia to complete prevention due to idiopathic hypersomnia for all items except work productivity loss, which uses an open-text response; higher numbers indicate greater impairmentb |
| Visual analog scale for sleep inertia (VAS-SI) | Patients’ difficulty awakening in the morning | Daily | 1 | 100-mm line with end anchors labeled “very easy” and “very difficult”; higher scores indicate more severe sleep inertiac |

aThe domain score was first computed as the mean of the scores from items (within that domain) with a score of ≥1; the total score was calculated by using the mean of the domain score, and multiplying the mean by 5 (ie, the number of domains).

bScores were expressed as impairment percentages with respect to percent work time missed due to problem, percent impairment while working due to problem, percent overall work impairment due to problem, and percent activity due to problem.

cBecause participants completed the VAS-SI daily, two mean weekly scores were calculated using the daily values from the last 14 days of each period; the mean score for the interval was calculated by summing the VAS-SI scores over the 7 days and dividing the number of days on which a VAS-SI score was completed.

VAS-SI, visual analog scale for sleep inertia.

Table S3—Participant demographic and health characteristics for the hybrid interviews.

| Characteristic | Total (N=20) n (%)a |
| --- | --- |
| Age, years | |
| Range (minimum–maximum) | 22.5–59.0 |
| Mean (standard deviation) | 35.0 (10.2) |
| Sex | |
| Female | 14 (70.0) |
| Male | 6 (30.0) |
| Spanish/Hispanic/Latinob | |
| Not Spanish/Hispanic/Latino | 20 (100.0) |
| Spanish | 1 (5.0) |
| Raceb | |
| White | 18 (90.0) |
| Asian | 1 (5.0) |
| Iranian | 1 (5.0) |
| Education | |
| Some college or certificate program | 2 (10.0) |
| College or university degree (2- or 4-year) | 12 (60.0) |
| Graduate or professional degree | 6 (30.0) |
| Annual household income | |
| Under $25,000 | 1 (5.0) |
| $25,000 to $49,999 | 3 (15.0) |
| $50,000 to $74,999 | 6 (30.0) |
| $75,000 to $99,999 | 3 (15.0) |
| $100,000 and over | 5 (25.0) |
| Not answered | 2 (10.0) |
| Work statusb | |
| Working full-time | 13 (65.0) |
| Working part-time | 2 (10.0) |
| Homemaker | 3 (15.0) |
| Student | 2 (10.0) |
| On disability | 1 (5.0) |
| Other | 1 (5.0) |
| General health | |
| Excellent | 3 (15.0) |
| Very good | 6 (30.0) |
| Good | 9 (45.0) |
| Fair | 2 (10.0) |
| Overall idiopathic hypersomnia severity | |
| Mild | 1 (5.0) |
| Moderate | 7 (35.0) |
| Severe | 10 (50.0) |
| Very severe | 2 (10.0) |

aOr other statistic as indicated.

bNot mutually exclusive.

Table S4—Sign and symptom concepts of idiopathic hypersomnia.

| Participant-Reported Concept | Description | Frequency of Reports,  N=20  n (%) | Most Bothersome,a N=20  n (%) | Most Important to Improve,a  N=20  n (%) | Concept Measured by IHSS, yes/no |
| --- | --- | --- | --- | --- | --- |
| Symptoms | | | | | |
| Excessive daytime sleepiness | Described as an overwhelming desire or urge to sleep during the day, often leading to frequent napping and lack of motivation; also referred to as tiredness or lack of energy that cannot be resolved by sleep; difficulty staying awake or alert and experienced as both physical and mental tiredness | 20 (100.0) | 14 (70.0) | 15 (75.0) | Yes:  Item 9: During the day, while carrying out activities that are not very stimulating, do you ever struggle to stay awake? |
| Sleep inertia | Difficulty awakening; grogginess, tiredness, and brain fog upon waking; often resulting in the need for multiple alarm or wake-up calls; a prolonged period of waking up that may last for 30 minutes to multiple hours | 19 (95.0) | — | — | Yes:  Item 3: Is it extremely difficult for you, or even impossible, to wake in the morning without several alarm calls or the help of someone else?  Item 4: After a night’s sleep, how long does it take you to feel you are functioning properly after you get up (in other words fully functional, both physically and intellectually)? |
| Brain fog | Described as short-term memory loss and an overall sense of dullness/fogginess; feeling disoriented and disconnected; may result in difficulty speaking (ie, cannot think of words while speaking, loses track of conversations), reading, writing, driving, and doing daily activities | 16 (80.0) | 2 (10.0) | 3 (15.0) | Yes:  Item 4: After a night’s sleep, how long does it take you to feel you are functioning properly after you get up (in other words fully functional, both physically and intellectually)?  Item 11: Do you consider that your hypersomnolence is a problem in terms of your proper intellectual functioning (ie, problems with concentration, memory problems, decrease in your intellectual performance)? |
| Sleep 10–11 hours | Described as needing to sleep for at least 10 hours on average, if left uninterrupted | 16 (80.0) | 1 (5.0) | 1 (5.0) | Yes:  Item 1: What, for you, is the ideal duration of night-time sleep (at the weekend or on holiday, for example)?b |
| Sleep drunkenness | Described as feeling disoriented, clumsiness, unalert or unaware upon awakening; often leading to doing or saying things that do not make sense; may last for a few minutes to many hours after waking up | 13 (65.0) | 2 (10.0) | — | Yes:  Item 4: After a night’s sleep, how long does it take you to feel you are functioning properly after you get up (in other words fully functional, both physically and intellectually)?  Item 5: In the minutes after waking up, do you ever do irrational things and/or say irrational things, and/or are you very clumsy (for example, tripping, breaking things or dropping things)? |
| Feeling unrested after sleeping | Described as not feeling refreshed, feeling drowsy or still tired, even after having gotten a full night’s sleep | 5 (25.0) | — | — | Yes:  Item 2: When circumstances require that you get up at a particular time in the morning (for example, for work or studies or to take the children to school during the week), do you feel that you have not had enough sleep?  Item 8: In general, how do you feel after a nap? |
| Fatigue | Described as feeling drained; not functioning at full physical or mental capacity; experienced throughout the body | 4 (20.0) | 1 (5.0) | 1 (5.0) | Yes:  Item 10: Do you consider that your hypersomnolence has an impact on your general health (ie, lack of energy, no motivation to do things, physical fatigue on exertion, decrease in physical fitness)? |
| Excessive sleeping during the day | Described as needing to nap frequently or for long periods during the day | 3 (15.0) | — | — | Yes:  Item 6: During the day, when circumstances allow, do you ever take a nap?  Item 7: What for you is the ideal length of your naps (at the weekend or on holiday, for example)? Note: If you take several naps, add them all togetherc |
| Headache | Described as chronic, low-grade pressure around the eyes | 2 (10.0) | — | — | Not assessed by the IHSS |
| Memory loss | Described as forgetting conversations, people and events; impaired recall and forgetfulness | 2 (10.0) | — | — | Item 11: Do you consider that your hypersomnolence is a problem in terms of your proper intellectual functioning (ie, problems with concentration, memory problems, decrease in your intellectual performance)? |
| Dysautonomia | Described as dysregulation of body temperature leading to abnormal heat or coldness | 1 (5.0) | — | — | Not assessed by the IHSS |
| Electric shock | Described as a shock-like feeling experienced throughout the body when experiencing severe tiredness; a pulse that reverberates through the body upon sharp, auditory, visual or tactile external stimuli | 1 (5.0) | — | — | Not assessed by the IHSS |
| Fainting spell | Described as physically collapsing when experiencing extreme tiredness; losing control of ability to walk/stand; may only be resolved by resting | 1 (5.0) | — | — | Not assessed by the IHSS |
| Hallucinations | Described as periods of false reality upon awakening; seeing people and scenes that are not real | 1 (5.0) | — | — | Not assessed by the IHSS |
| Hypnagogic jerks | Described as a brief spasm or tensing of the muscles throughout the body; experienced with extreme tiredness | 1 (5.0) | — | — | Not assessed by the IHSS |
| Microsleep | Described as a period of autonomous function, in which the body continues a physical action while the brain is in a sleep-like state | 1 (5.0) | — | — | Not assessed by the IHSS |
| Muscle fatigue | Described as muscle weakness and an ache experienced throughout the entire body, particularly affecting the legs and ability to walk; experienced with exhaustion | 1 (5.0) | — | — | Yes:  Item 10: Do you consider that your hypersomnolence has an impact on your general health (ie, lack of energy, no motivation to do things, physical fatigue on exertion, decrease in physical  fitness)? |
| Sleep paralysis | Described as a period of time before awakening during which the body is paralyzed | 1 (5.0) | — | — | Not assessed by the IHSS |

aCounts are not mutually exclusive.

b*Ideal duration of night-time sleep* refers to participants’ ideal duration of nighttime sleep needed to avoid sleep deprivation since developing idiopathic hypersomnia.

c*Ideal length of naps* refers to participants’ ideal length of naps since developing idiopathic hypersomnia.

IHSS, Idiopathic Hypersomnia Severity Scale.

Table S5—Concepts of idiopathic hypersomnia.

| Participant-Reported Concept | Description | Frequency of Reports,  N=20  n (%) | Most Bothersome,a N=20  n (%) | Most Important to Improve,a  N=20  n (%) | Concept Measured by IHSS, yes/no |
| --- | --- | --- | --- | --- | --- |
| Emotional | | | — | — | Yes:  Item 12: Do you consider that your hypersomnolence affects your mood (for example, sadness, anxiety, hypersensitivity, irritability)? |
| Feeling frustrated | Described as feeling upset to not be able to complete tasks, attend events, develop relationships, or fully function mentally and/or physically due to symptoms | 9 (45.0) | — | — |
| Feeling depressed | Feeling down or sad; having low motivation and being unable to find joy in activities | 8 (40.0) | — | — |
| Feeling angry | Described as feeling mad at symptoms or circumstances the condition causes; may result in violent actions | 3 (15.0) | — | — |
| Feeling anxious | Described as feeling overwhelmed or panicked; feeling trapped due to symptoms or condition | 3 (15.0) | — | — |
| Feeling embarrassed | Described as being uncomfortable being perceived by others as strange or not normal due to appearance of symptoms | 3 (15.0) | — | — |
| Feeling like a failure | Feelings of being unable to complete tasks or achieve one’s full potential | 3 (15.0) | — | — |
| Feeling hopeless | Feeling of despair and inability to get things done or enjoy activities | 3 (15.0) | — | — |
| Feeling guilty | Described as feeling shame for not completing more tasks or being productive; feeling like you’re letting others down | 3 (15.0) | — | — |
| Feeling scared | Described as feeling afraid that symptoms will occur at random | 3 (15.0) | — | — |
| Feeling grumpy | Described as feeling irritable toward others | 2 (10.0) | — | — |
| Devastation | Described as feeling like one’s quality of life and previous abilities have been lost | 1 (5.0) | — | — |
| Discomfort | Described as feeling unsafe or out of control due to symptoms | 1 (5.0) | — | — |
| Dread | Described as needing to overcome a constant, daily struggle | 1 (5.0) | — | — |
| Feeling impatient | Described as having limited patience and difficulty keeping emotions under control due to tiredness | 1 (5.0) | — | — |
| Feeling overwhelmed | Described as feeling panicked and unable to complete tasks | 1 (5.0) | — | — |
| Cognitive | | | 6 (30.0) | 8 (40.0) | Yes:  Item 4: After a night’s sleep, how long does it take you to feel you are functioning properly after you get up (in other words fully functional, both physically and intellectually)?  Item 11: Do you consider that your hypersomnolence is a problem in terms of your proper intellectual functioning (ie, problems with concentration, memory problems, decrease in your intellectual performance)?  Item 14: Do you consider that your hypersomnolence is a problem in terms of your driving a car? |
| Inability to remember | Described as an inability to recall short- and long-term memories; inability to remember to do tasks or attend appointments; forgetting names, dates, and places; forgetting actions or current activities | 14 (70.0) | — | — |
| Inability to concentrate | Described as being unable to complete tasks or to multitask due to inability to focus and memory issues; easily distracted and inability to focus during a conversation, in school, or at work | 13 (65.0) | — | — |
| Lack of motivation | Described as a lack of desire to be engaged, be active, or complete activities | 8 (40.0) | — | — |
| Difficulty with time management | Difficulty being on time to attend appointments and go to work or school; difficulty planning how long things will take; procrastination due to urge to sleep | 6 (30.0) | — | — |
| Inability to be alert | Described as feeling slow, disengaged, and unaware of oneself or his/her surroundings | 6 (30.0) | — | — |
| Inability to articulate | Described as difficulty forming thoughts and communicating, mainly in verbal conversations with others | 5 (25.0) | — | — |
| Difficulty reading/writing | Difficulty reading and writing due to symptoms | 3 (15.0) | — | — |
| Inability to drive | Described as a lack of awareness of actions or surroundings while operating a car and navigating to a location | 3 (15.0) | — | — |
| Inability to think | Described as an inability to process thoughts or understand things | 3 (15.0) | — | — |
| Work | | | 3 (15.0) | 4 (20.0) | Yes:  Item 9: During the day, while carrying out activities that are not very stimulating, do you ever struggle to stay awake?  Item 13: Do you consider that your hypersomnolence prevents you from carrying out daily tasks properly (family-related or household tasks, school, leisure, or job-related tasks)? |
| Difficulty working | Described as difficulty completing work efficiently due to lack of concentration and tiredness; loss of productivity, and impact on quality of work produced, due to cognitive impairments and symptoms; difficulty working an entire day due to loss of energy | 11 (55.0) | — | — |
| Having to change jobs | Described as needing to change role or responsibilities at work due to limited ability to perform in current role due to impacts of the condition | 3 (15.0) | — | — |
| Impact on professional relationships | Difficulty establishing meaningful relationships with coworkers; lack of understanding from coworkers or employer | 2 (10.0) | — | — |
| Limited or adjusted work hours | Needing to schedule or adjust work hours to accommodate sleep schedule and symptoms | 2 (10.0) | — | — |
| Loss of job | Described as getting discharged or fired from a job after sharing diagnosis with an employer | 2 (10.0) | — | — |
| Unable to work | Inability to work full-time, or at all, due to symptoms; inability to hold a job long-term due to difficulties working | 2 (10.0) | — | — |
| Ability to maintain a job | Difficulty consistently attending and performing at work while also attending school | 1 (5.0) | — | — |
| Arrive late to work | Difficulty consistently attending and performing at work while also attending school | 1 (5.0) | — | — |
| Difficulty in applying for a job | Described as difficulty obtaining employment due to lack of understanding or negative perception of an individual’s diagnosis | 1 (5.0) | — | — |
| Falling asleep at work | Described as falling asleep while working, such as while sitting at a desk on the computer | 1 (5.0) | — | — |
| Have to take days off | Described as needing to take an extra day off of work following travel or time off to prepare to return (ie, recharge) | 1 (5.0) | — | — |
| Limitations to commute | Described as difficulty driving to work and needing to shorten time to commute due to onset of symptoms while driving | 1 (5.0) | — | — |
| **Household chores/responsibilities** | | | 1 (5.0) | — | Yes:  Item 13: Do you consider that your hypersomnolence prevents you from carrying out daily tasks properly (family-related or household tasks, school, leisure, or job-related tasks)? |
| Limitation to complete household chores | Difficulty completing tasks around the home such as cooking, cleaning, doing laundry or yardwork; difficulty in maintaining a clean home regularly due to symptoms or keeping up with daily responsibilities around the home; chores may require an extended period of time to be completed or may never be completed depending on the severity of daily symptoms | 17 (85.0) | — | — |
| Need to set a routine | Described as a need to structure one’s schedule, particularly when getting ready in the morning, such as chronologically ordering tasks like showering, getting dressed, making breakfast, and leaving for work | 2 (10.0) | — | — |
| **Social activities** | | | — | 1 (5.0) | Not assessed by the IHSS; although the IHSS does not assess social activities directly, Item 13 does touch on family-related and leisure tasks that may encompass social activities |
| Limited participation in social activities | Described as difficulty, hesitancy, or avoidance of engaging in activities with others, such as attending events, going to a friend’s house, or making plans with friends, due to symptoms such as tiredness; difficulty attending social activities in the morning or at night because it would interrupt an individual’s sleep schedule | 16 (80.0) | — | — |
| Leaving social events early to sleep | Described as wanting or needing to leave events, such as parties or family events early, due to tiredness | 2 (10.0) | — | — |
| **Recreational/leisure activities** | | | 2 (10.0) | 4 (20.0) | Yes:  Item 13: Do you consider that your hypersomnolence prevents you from carrying out daily tasks properly (family-related or household tasks, school, leisure, or job-related tasks)? |
| Limited participation in recreational/leisure activities | Described as a limited ability or difficulty participating in activities such as playing video games, playing an instrument, reading, attending a concert, or biking, due to lack of energy and excessive daytime sleepiness, among other symptoms; difficulty finding the energy to participate in activities, especially after work or school | 13 (65.0) | — | — |
| Difficulty completing quiet activities | Described as difficulty spending time on quiet activities that require alertness or focus, such as reading or watching a movie | 4 (20.0) | — | — |
| Needing to take frequent breaks during leisure activities | Described as needing to stop while working on the computer frequently | 1 (5.0) | — | — |
| **Physical function** | | | 1 (5.0) | — | Yes:  Item 5: In the minutes after waking up, do you ever do irrational things and/or say irrational things and/or are you very clumsy (for example, tripping up, breaking things, or dropping things)?  Item 10: Do you consider that your hypersomnolence has an impact on your general health (ie, lack of energy, no motivation to do things, physical fatigue on exertion, decrease in physical fitness)? |
| Limitations in physical activities | Difficulty participating, or sustaining participation, in exercise, sports, swimming, or biking, among other physical activities due to symptoms such as sleepiness and fatigue | 10 (50.0) | — | — |
| Limited physical functioning | Described as limited ability to perform physically, such as being unable to use arms or legs for exercise | 4 (20.0) | — | — |
| Limited energy levels | Described as having a limited amount of energy to spend on activities | 3 (15.0) | — | — |
| Back pain | Described as experiencing extreme back pain and spasms from sleeping too long | 1 (5.0) | — | — |
| **Activities of daily living** | | | — | — | Yes:  Item 5: In the minutes after waking up, do you ever do irrational things and/or say irrational things, and/or are you very clumsy (for example, tripping up, breaking things, or dropping things)?  Item 10: Do you consider that your hypersomnolence has an impact on your general health (ie, lack of energy, no motivation to do things, physical fatigue on exertion, decrease in physical fitness)? |
| Ability to perform personal hygiene | Difficulty or lack of motivation to perform basic self-care and self-hygiene activities such as showering or brushing teeth due to lack of energy and urge to sleep, among other symptoms | 11 (55.0) | — | — |
| Ability to dress oneself | Inability or lack of motivation to get dressed, often from pajamas to day clothes, due to lack of energy and sleepiness, among other symptoms | 3 (15.0) | — | — |
| Ability to walk | Limited ambulation and mobility | 2 (10.0) | — | — |
| **Spouse/partner relationships** | | | 4 (20.0) | 1 (5.0) | Not assessed by the IHSS |
| Impact on relationship with spouse/partner | Limited ability to engage or grow a meaningful relationship with significant other or spouse due to symptoms; lack of understanding from significant other or spouse may lead to negative perception of individual; limited ability to contribute to a relationship due to constant symptoms | 9 (45.0) | — | — |
| Adjusting schedules to be together | Described as needing to adjust daily schedules to accommodate sleep schedule | 1 (5.0) | — | — |
| Impact on intimacy | Limited ability to be physically intimate with spouse due to restrictive sleep schedule | 1 (5.0) | — | — |
| **Other family/friend relationships** | | | — | — | Not assessed by the IHSS |
| Impact on relationships with friends or family | Limited ability to engage in or establish meaningful relationships with relatives or friends due to symptoms; feeling left out of meaningful relationships; lack of understanding from others hinders relationships | 10 (50.0) | — | — |
| **Adaptive behavior** | | | 1 (5.0) | 1 (5.0) | Yes:  Item 14: Do you consider that your hypersomnolence is a problem in terms of your driving a car? (for “adapt behavior in order to drive”)  Item 3: Is it extremely difficult for you, or even impossible, to wake in the morning without several alarm calls or the help of someone else? (for “implementing coping mechanisms”) |
| Adapt behavior in order to drive | Described as needing to take frequent breaks while driving to avoid falling asleep; avoiding driving when not taking medication or when experiencing symptoms such as excessive daytime sleepiness or brain fog; requiring another form of transportation or someone else to drive, either at all times or when experiencing extremely severe symptoms | 7 (35.0) | — | — |
| Changes to diet | Described as altering diet to minimize daytime sleepiness | 1 (5.0) | — | — |
| Changes in medication | Described as altering type of medication to mitigate side effects | 1 (5.0) | — | — |
| Implementing coping mechanisms | Requiring reminders on the phone, alarms, to-do lists, and set routines to cope with forgetfulness | 1 (5.0) | — | — |
| **Sleep function** | | | — | — | Yes:  Item 14: Do you consider that your hypersomnolence is a problem in terms of your driving a car? (for “inability to drive due to sleep”) |
| Inability to drive due to sleep | Described as being unable to drive due to trouble staying awake | 4 (20.0) | — | — |
| Violent behavior at night | Described as having violent episodes while sleeping in bed, in the morning, or in the late evening, resulting in the need to sleep alone | 1 (5.0) | — | — |
| **School** | | | — | — | Yes:  Item 13: Do you consider that your hypersomnolence prevents you from carrying out daily tasks properly (family-related or household tasks, school, leisure, or job-related tasks)? |
| Delayed graduation | Described as needing to take their time receiving their bachelor’s degree due to the inability to remember things | 1 (5.0) | — | — |
| Difficulty doing homework | Described as being unable to finish homework due to feeling tired | 1 (5.0) | — | — |
| Dropped out | Described as needing to leave PhD program due to loss of productivity | 1 (5.0) | — | — |
| Forgetting things | Described as difficulty performing at school due to forgetting information | 1 (5.0) | — | — |
| Lack of productivity | Described as lack of productivity when completing school | 1 (5.0) | — | — |
| Limited workload | Described as a limited ability to take more classes or more hours at work due to nap schedule | 1 (5.0) | — | — |
| Missing school | Described as missing class due to not getting up in the morning | 1 (5.0) | — | — |
| **Caregiver responsibility** | | | — | — | Yes:  Item 13: Do you consider that your hypersomnolence prevents you from carrying out daily tasks properly (family-related or household tasks, school, leisure, or job-related tasks)? |
| Taking care of children | Described as a limited ability to care for children or engage in activities with children | 3 (15.0) | — | — |
| Example for kids | Described as a feeling of setting a bad example for children due to frequency of symptoms and napping | 1 (5.0) | — | — |
| **Self-image** | | | — | — | Not assessed by the IHSS |
| Perception from others | Described as feeling as though others are perceiving one as lazy; disappointment or disturbance from others | 3 (15.0) | — | — |
| Self-esteem | Described as feeling down about oneself | 2 (10.0) | — | — |
| Not receiving appropriate care due to perception of others | Described as not receiving an adequate standard of care due to lack of trust from healthcare professionals or not receiving appropriate accommodation from others | 1 (5.0) | — | — |
| **Family activities** | | | — | — | Yes:  Item 13: Do you consider that your hypersomnolence prevents you from carrying out daily tasks properly (family-related or household tasks, school, leisure, or job-related tasks)? |
| Spending time with children | Limited ability to spend time with children due to symptoms such as sleepiness | 2 (10.0) | — | — |
| **Spouse/partner activities** | | | — | — | Not assessed by the IHSS; though the IHSS does not directly assess activities with spouse/ partner, Item 13 does touch on family-related and leisure tasks that may encompass social activities |
| Unable to participate in activities with spouse/partner | Described as an inability to engage in activities with significant other or spouse, such as going to the movie theater; needing to leave an event with a spouse early, such as concert, because of urge to sleep | 2 (10.0) | — | — |
| **Financial** | | | — | — | Not assessed by the IHSS |
| Unable to work | Described as impacted financially due to difficulty working | 1 (5.0) | — | — |
| **Independence** | | | — | — | Not assessed by the IHSS |
| Needing to maintain a schedule | Described as needing to plan routine around symptoms | 1 (5.0) | — | — |

aCounts are not mutually exclusive.

IHSS, Idiopathic Hypersomnia Severity Scale.

| Table S6—Standardized factor loadings from exploratory bifactor analysis of IHSS item responses.a | | | | | | | | | | | | | | | |
| --- | --- | --- | --- | --- | --- | --- | --- | --- | --- | --- | --- | --- | --- | --- | --- |
| Item | Baseline | | | Week 1 | | | Week 8 | | | eSDP | | | eDBRWP | | |
| General | NSI | DP | General | NSI | DP | General | NSI | DP | General | NSI | DP | General | NSI | DP |
| 1 | 0.58 | 0.58 |  | 0.58 | 0.58 |  | 0.58 | 0.58 |  | 0.58 | 0.58 |  | 0.58 | 0.58 |  |
| 2 | 0.58 | 0.04 |  | 0.43 | 0.42 |  | 0.59 | –0.07 |  | 0.46 | –0.03 |  | 0.49 | 0.40 |  |
| 3 | **0.82** | –0.03 |  | 0.56 | 0.48 |  | 0.55 | –0.05 |  | 0.45 | –0.30 |  | **0.72** | 0.42 |  |
| 4 | **0.70** | –0.04 |  | 0.61 | 0.34 |  | **0.75** | –0.07 |  | 0.64 | 0.03 |  | 0.65 | 0.33 |  |
| 5 | 0.56 |  | 0.59 | 0.58 |  | 0.58 | 0.37 |  | 0.66 | **0.70** |  | 0.50 | 0.57 |  | 0.58 |
| 6 | 0.38 |  | –0.07 | 0.62 |  | 0.00 | 0.67 |  | –0.21 | 0.39 |  | 0.66 | 0.60 |  | –0.26 |
| 7 | 0.68 |  | –0.34 | **0.87** |  | –0.36 | **0.74** |  | –0.33 | 0.39 |  | 0.68 | 0.62 |  | –0.42 |
| 8 | 0.62 | 0.13 |  | 0.42 | 0.55 |  | 0.69 | –0.39 |  | 0.57 | –0.33 |  | 0.67 | 0.41 |  |
| 9 | 0.45 |  | 0.46 | 0.69 |  | 0.28 | **0.77** |  | 0.08 | **0.77** |  | 0.31 | **0.74** |  | –0.03 |
| 10 | 0.59 |  | 0.65 | 0.68 |  | 0.49 | **0.80** |  | 0.41 | **0.95** |  | 0.01 | **0.82** |  | 0.50 |
| 11 | 0.45 |  | 0.69 | 0.45 |  | 0.67 | 0.67 |  | 0.57 | **0.90** |  | –0.18 | **0.76** |  | 0.51 |
| 12 | 0.38 |  | 0.52 | 0.36 |  | 0.55 | 0.65 |  | 0.57 | **0.90** |  | –0.17 | **0.80** |  | 0.31 |
| 13 | 0.46 |  | 0.66 | 0.63 |  | 0.56 | **0.78** |  | 0.48 | **0.88** |  | –0.09 | **0.82** |  | 0.45 |
| 14 | 0.19 |  | 0.33 | 0.30 |  | 0.22 | 0.47 |  | 0.14 | 0.52 |  | –0.14 | 0.46 |  | 0.22 |

aModerate factor loadings (between 0.30 and 0.69 in magnitude) are underlined; strong factor loadings (≥0.70 in magnitude) are boldfaced.

DP, Daytime Performance; eDBRWP, end of Double-Blind Randomized Withdrawal Period; eSDP, end of Stable Dose Period; IHSS, Idiopathic Hypersomnia Severity Scale; NSI, Night/Sleep Inertia.
